# Supplementary material for: Geraniol, a Potential Alternative to Antibiotics for Bovine Mastitis Treatment Without Disturbing the Host Microbial Community, Does Not Lead to Drug Residues or Induce Drug Resistance
Source: Research Square preprint supplement (doi:10.21203/rs.3.rs-845781/v1), 2021-09-15
Supplement: Supplementary file 1 [file a13a3d06cc2b79749dff7a95.xlsx]

## Sheet: Sheet2
Table S1. Detailed information of cows in this study.
SampleID	Age(month)	Variety	Health condition	Location	Treatment group
H_1	66	Holstein-Friesian	Healthy	Qingbaijiang District, Chengdu	Ccontrol
H_2	75	Holstein-Friesian	Healthy	Qingbaijiang District, Chengdu	Ccontrol
H_3	65	Holstein-Friesian	Healthy	Qingbaijiang District, Chengdu	Ccontrol
H_4	53	Holstein-Friesian	Healthy	Qingbaijiang District, Chengdu	Ccontrol
H_5	47	Holstein-Friesian	Healthy	Qingbaijiang District, Chengdu	Ccontrol
H_6	60	Holstein-Friesian	Healthy	Qingbaijiang District, Chengdu	Ccontrol
H_7	64	Holstein-Friesian	Healthy	Qingbaijiang District, Chengdu	Ccontrol
H_8	57	Holstein-Friesian	Healthy	Qingbaijiang District, Chengdu	Ccontrol
H_9	87	Holstein-Friesian	Healthy	Qingbaijiang District, Chengdu	Ccontrol
H_10	64	Holstein-Friesian	Healthy	Qingbaijiang District, Chengdu	Ccontrol
H_11	59	Holstein-Friesian	Healthy	Qingbaijiang District, Chengdu	Ccontrol
H_12	72	Holstein-Friesian	Healthy	Qingbaijiang District, Chengdu	Ccontrol
CA_1	62	Holstein-Friesian	Mastitis	Qingbaijiang District, Chengdu	Antibiotic
CA_2	60	Holstein-Friesian	Mastitis	Qingbaijiang District, Chengdu	Antibiotic
CA_3	85	Holstein-Friesian	Mastitis	Qingbaijiang District, Chengdu	Antibiotic
CA_4	50	Holstein-Friesian	Mastitis	Qingbaijiang District, Chengdu	Antibiotic
CA_5	66	Holstein-Friesian	Mastitis	Qingbaijiang District, Chengdu	Antibiotic
CA_6	62	Holstein-Friesian	Mastitis	Qingbaijiang District, Chengdu	Antibiotic
CA_7	48	Holstein-Friesian	Mastitis	Qingbaijiang District, Chengdu	Antibiotic
CA_8	58	Holstein-Friesian	Mastitis	Qingbaijiang District, Chengdu	Antibiotic
CA_9	98	Holstein-Friesian	Mastitis	Qingbaijiang District, Chengdu	Antibiotic
CA_10	54	Holstein-Friesian	Mastitis	Qingbaijiang District, Chengdu	Antibiotic
CA_11	55	Holstein-Friesian	Mastitis	Qingbaijiang District, Chengdu	Antibiotic
CA_12	88	Holstein-Friesian	Mastitis	Qingbaijiang District, Chengdu	Antibiotic
CA_13	95	Holstein-Friesian	Mastitis	Qingbaijiang District, Chengdu	Antibiotic
CG_1	84	Holstein-Friesian	Mastitis	Qingbaijiang District, Chengdu	Geraniol
CG_2	86	Holstein-Friesian	Mastitis	Qingbaijiang District, Chengdu	Geraniol
CG_3	62	Holstein-Friesian	Mastitis	Qingbaijiang District, Chengdu	Geraniol
CG_4	74	Holstein-Friesian	Mastitis	Qingbaijiang District, Chengdu	Geraniol
CG_5	86	Holstein-Friesian	Mastitis	Qingbaijiang District, Chengdu	Geraniol
CG_6	61	Holstein-Friesian	Mastitis	Qingbaijiang District, Chengdu	Geraniol
CG_7	47	Holstein-Friesian	Mastitis	Qingbaijiang District, Chengdu	Geraniol
CG_8	60	Holstein-Friesian	Mastitis	Qingbaijiang District, Chengdu	Geraniol
CG_9	71	Holstein-Friesian	Mastitis	Qingbaijiang District, Chengdu	Geraniol
CG_10	62	Holstein-Friesian	Mastitis	Qingbaijiang District, Chengdu	Geraniol
CG_11	85	Holstein-Friesian	Mastitis	Qingbaijiang District, Chengdu	Geraniol
CG_12	63	Holstein-Friesian	Mastitis	Qingbaijiang District, Chengdu	Geraniol
